# Supplementary material
Source: publisher figshare collection journal article supplement (https://acs.figshare.com/ndownloader/files/20785122)
Supplement: Supplementary file 1 [file 20785122]

## Supporting Information

### Determination of Optimal Electrospray Parameters for Lipidomics in Infrared Matrix Assisted Laser Desorption Electrospray Ionization (IR-MALDESI) Mass Spectrometry Imaging

M. Caleb Bagley<sup>1</sup>, Måns Ekelöf<sup>1</sup>, David C. Muddiman<sup>1,2</sup>

<sup>1</sup>FTMS Laboratory for Human Health Research, Department of Chemistry, <sup>2</sup>Molecular Education, Technology, and Research Innovation Center (METRIC), North Carolina State University, Raleigh, NC 27695

*Journal of The American Society for Mass Spectrometry*

**Keywords:** IR-MALDESI; Mass Spectrometry Imaging; Electrospray Ionization; Metabolites; Lipids

#### **\*Corresponding Author**

David C. Muddiman, Ph.D.

FTMS Laboratory for Human Health Research

Department of Chemistry

North Carolina State University

Phone: 919-513-0084

Email: dcmuddim@ncsu.edu

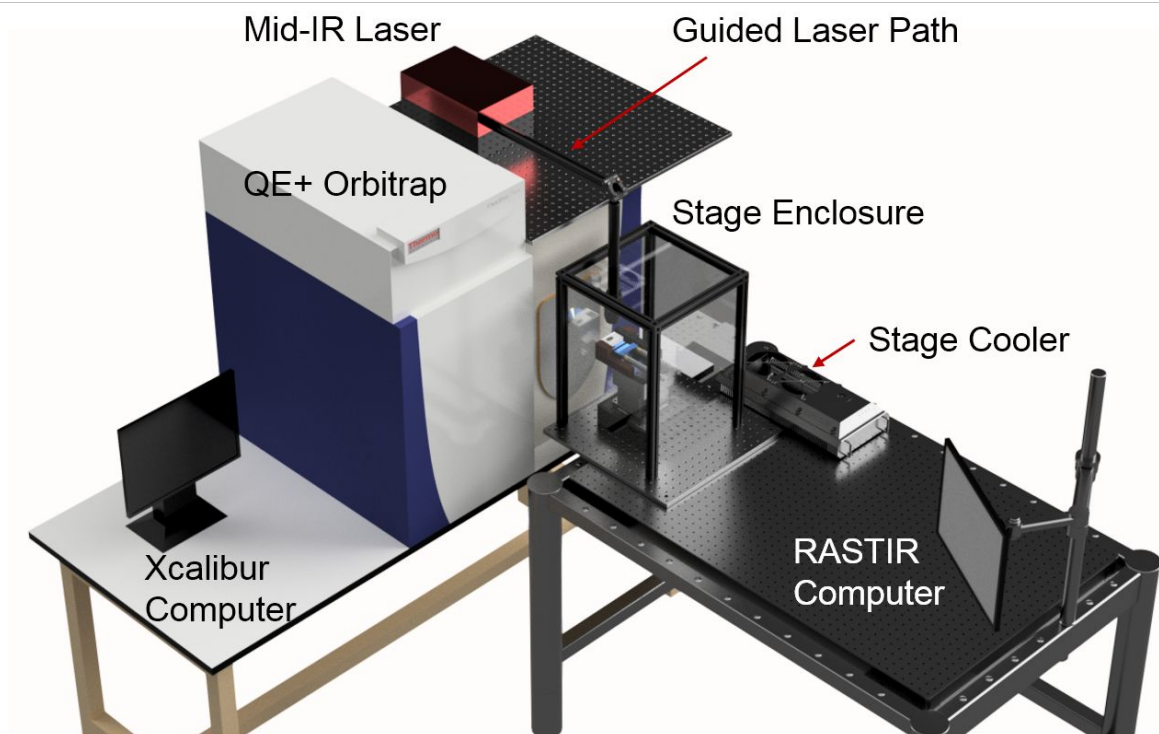

**Figure 1.** Schematic of IR-MALDESI experimental setup.

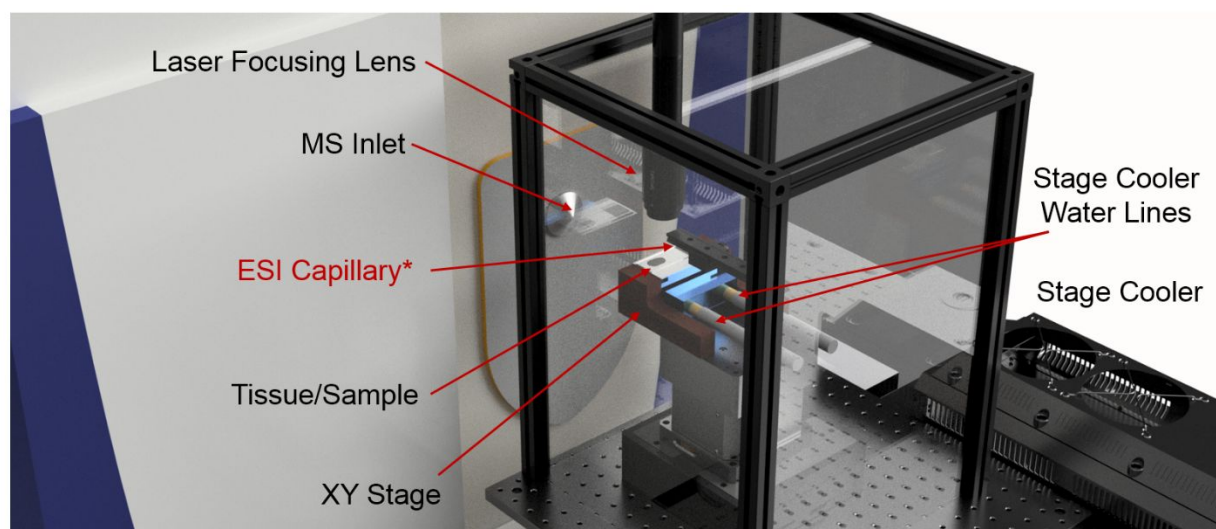

\*where the applied voltage is applied to the changing electrospray compositions

**Figure 2.** Close-up of IR-MALDESI sampling, with the components changed for this experiment highlighted in red.

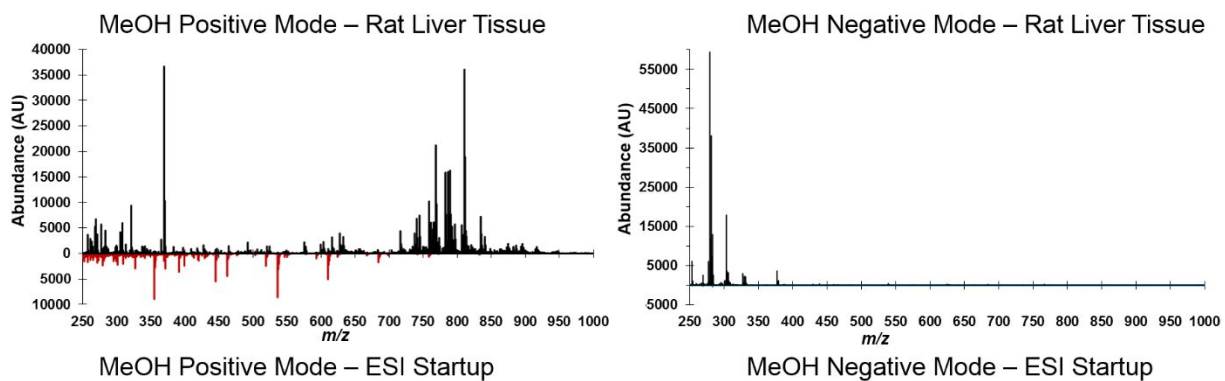

**Figure 3.** Representative spectra showing the differences in on tissue analysis in both polarities compared to the ESI background spectra collected before daily experiments.

| ACN Gradient |       |                | MeOH Gradient |        |                |
|--------------|-------|----------------|---------------|--------|----------------|
| Time         | % ACN | Voltages       | Time          | % MeOH | Voltages       |
| 0            | 35    | 2.5, 2.75,     | 0             | 45     | 2.25, 2.5,     |
| 2.5          | 35    | 3.0, 3.2, 3.4, | 2.5           | 45     | 2.75, 3.0,     |
| 32.5         | 75    | 3.6, 3.8, 4.0, | 32.5          | 75     | 3.2, 3.4, 3.6, |
| 35           | 75    | 4.2, 4.5       | 35            | 75     | 3.8, 4.0, 4.2  |

**Table 1.** 30-minutes long gradients were run over shorter solvent gradient ranges for both ACN and MeOH to determine which solvent compositions and voltages that are best for tissue analysis in positive mode.

| ACN Gradient |       |                | MeOH Gradient |        |                                              |
|--------------|-------|----------------|---------------|--------|----------------------------------------------|
| Time         | % ACN | Voltages       | Time          | % MeOH | Voltages                                     |
| 0            | 40    | 2.25, 2.5,     | 0             | 20     | 3.0, 3.2, 3.4,<br>3.6, 3.8, 4.0,<br>4.2, 4.5 |
| 2.5          | 40    | 2.75, 3.0,     | 2.5           | 20     |                                              |
| 27.5         | 75    | 3.2, 3.4, 3.6, | 27.5          | 55     |                                              |
| 30           | 75    | 3.8            | 30            | 55     |                                              |

**Table 2.** 25-minutes long gradients were run over shorter solvent gradient ranges for both ACN and MeOH to determine which solvent compositions and voltages that are best for tissue analysis in negative mode.

**Excel Spreadsheet (.xlsx file):** Details of Lipids Used for Characterization in both the positive and negative ion mode. **Note:** This is a separate file.
